# Supplementary material for: The cytosolic carboxypeptidases CCP2 and CCP3 catalyze posttranslational removal of acidic amino acids
Source: PubMed Central journal article supplement — Mol Biol Cell. 2014 Oct 1;25(19):3017–27. doi: 10.1091/mbc.E14-06-1072 (PMC4230590; doi:10.1091/mbc.e14-06-1072), 2014-10-01

# Supplemental Materials

*Molecular Biology of the Cell*

Tort et al.

## Supplemental Material

### Supplemental figure legends

**Figure S1. Structural alignment of CCPs and determination of amino acids of the active site. A)** Structural alignment of the catalytic domain of hCCP3 with the CCP crystal structures of *Pseudomonas aeruginosa* (PDB 4a37) (Otero *et al.*, 2012), *Burkholderia mallei* (PDB 3k2k) and *Shewanella denitrificans* (PDB 3l2n) obtained with the RaptorX server. **B)** Comparison of the amino acids shaping the S1' binding pocket in different carboxypeptidases with different defined amino-acid specificities. Residues are indicated following the RasMol amino color scheme that colors amino acids accordingly to their properties. <sup>a</sup>Residue 207 is the major determinant of specificity for M14B carboxypeptidases. <sup>b</sup>Residue 255 is the major determinant of specificity for M14A carboxypeptidases. <sup>c</sup>Carboxypeptidase isolated from *Thermoactinomyces vulgaris* that is a model for broad substrate specificity. <sup>d</sup>M14D is the proposed classification for the M14 members that constitute the CCP subfamily. **C)** Amino acid sequence alignment of the region around position 255 of CCPs and canonical bovine CPA. The positions known to participate in the binding of the substrate C-terminal residue are indicated.

**Figure S2. Sequence optimization of active mCCP2 and mCCP3.** To confirm that our truncated 65-kD versions of mCCP2 and mCCP3 (Figure 2A, B) represent the shortest active version of these enzymes, we further truncated short sequences at their N- and the C-termini. **A)** Scheme of full-length of mCCP6, mCCP2, mCCP3 and several truncated forms of mCCP2 and mCCP3. The green boxes indicate in the conserved N-terminal domain (Nt) specific to CCPs, the blue box is the conserved carboxypeptidase domain (CP; compare with Figure 2A). Carboxypeptidase domain schemes were delimited with Superfamily 1.73 database (Gough *et al.*, 2001). Gray lines are non-conserved sequences that were partially truncated in the optimization. **B)** Immunoblot analysis HEK293T cell extracts expressing different forms of YFP-mCCP2 and YFP-mCCP3 as shown in (A). The deglutamylase activity is monitored by the generation of  $\Delta 2$ -tubulin. 12G10 is used to control  $\alpha$ -tubulin loading. **C)** Secondary structure prediction of an essential C-terminal fragment determined in

mCCP2 and mCCP3 performed with Coils server (Lupas *et al.*, 1991). The fragment present in mCCP2\_Z1703 and mCCP3\_Z1670, but deleted in mCCP2\_1607 and mCCP3\_Z1583 has a high probability for coiled-coil structure. Coiled-coil structures are known to participate in structural stabilization and oligomerization of proteins (Parry *et al.*, 2008). It is thus possible that the removal of these coiled-coil sequences from mCCP2 and mCCP3 resulted in misfolded or destabilized enzymes, and consequently in loss-of-activity. Alternatively, it could indicate that both enzymes need to oligomerize for activity.

**Figure S3. Specificity tests for truncated mCCP2 and mCCP3.** Immunoblot analysis of HEK293T protein extracts co-expressing truncated forms of YFP-mCCPs and YFP-telokin variants. **A)** Co-expression of active or dead truncated forms of YFP-mCCP2 and YFP-mCCP3 together with YFP-telokin variants ending in different acidic tails to test their ability to release single or multiple Asp and/or Glu residues. Generation of the  $\Delta 2$ -tubulin epitope on telokin is used to monitor C-terminal degradation. mCCP1 is used as positive control for deglutamylation. Note that only mCCP3-Z1670 is efficiently removing single and consecutive Asp residues. See also Figure 3B. **B)** Epitope mapping of polyG antibody on artificial C-terminal tails of YFP-telokin with different numbers of Gly residues. Note that only poly-Gly chains of four and longer are recognized by this antibody. (\*non-specific band recognized by the polyG antibody). **C)** Schematic representation of the experimental setup used to identify deglutamylation and deglycylation activities. YFP-telokin with 3-Glu tails (detected by polyE) or 4-Gly tails (detected with polyG) are co-expressed with YFP-CCPs. The immunoblots show that truncated versions of YFP-mCCP2 and YFP-mCCP3 efficiently remove C-terminal Glu residues thus extinguishing the polyE signal. In contrast, no change in the polyG signal was detected in the deglycylation test.

**Figure S4. qRT-PCR analyses expression levels of mCCP1, mCCP4, mCCP5 and mCCP6 in murine tissues and analysis of *Agbl2* and *Agbl3* KO mice.** **A)** Relative expression levels of mCCP1, mCCP4, mCCP5 and mCCP6 in different organs of 4-month-old wild type mice as determined by

qRT-PCR. Average values relative to the *Tbp* gene expression are represented, and error bars represent standard deviation of three to five independent experiments. Experiments are complementary to Figure 4A. Values are used for Figure 4B. **B)** Comparative immunoblot analysis of protein extracts from different organs of 5-weeks old wild type (WT) and *Agbl2* or *Agbl3* KO mice with polyE. Total tubulin levels were detected with anti- $\alpha$ -tubulin antibody (12G10). Note that a 130-kDa substrate shows increased polyE signals stomach of *Agbl2* or *Agbl3* KO mice, and in oviduct of the *Agbl3* KO mouse.

**Figure S5. Analyses of the polyglutamylation levels in *Agbl2/Agbl3* double KO mice.** A) Immunoblots of testes and sperm extracts from four of each, WT and *Agbl2/Agbl3* double KO mice (mice 1, 2, 3, 5, 6 and 7 were 4 months old; mice 4 and 8 were 5 weeks old). The polyE and 12G10 signals as represented here have been quantified using the software ImageJ, and polyE values have been adjusted to the total tubulin load detected with the antibody 12G10. Mean values have been plotted in Figure 4E. \*Note that the 130-kDa polyE-positive protein band is only detected in the 5-week old mouse (which is shown in Figure 4D), but not in the older individuals.

**Figure S6. Strategy for the generation of the knockout mice.** Schematic representation in scale of the targeting vector used and all the possible alleles for *Agbl2* and *Agbl3* genes. Orange bar: genomic DNA. Black boxes: exons with their corresponding number. Green and purple arrowheads: LoxP and Flp sequences, respectively. White bar: *neo* cassette, with the neomycin resistance gene (white box). Blue lines: zone of sequence homology for homologous recombination, with the corresponding size in kbp. Black arrowheads: primers used for the PCR genotyping.

## Supplemental Tables

**Table S1.** Primers used to clone or mutagenize CCP genes and their truncated forms.

| Gene                          | Vector        | Primers Fw/Rev                                                                                  |
|-------------------------------|---------------|-------------------------------------------------------------------------------------------------|
| mCCP1                         | pcDNA3.1-EYFP | Fw: cgcgagtcgacACC ATGAGCAAGCTAAAAGTGGTGGGAGAG<br>Rev: cgccgctgatca AATCAGGTGTGTTCTTGATACCTCAG  |
| mCCP2                         | pEYFP         | Fw: cgcgactcgagACC ATGAATGTCCTGCTTGAGATGGCTTTTC<br>Rev: cgccgcatct TGGGTATGTGTATATATGCAAGGATGGG |
| mCCP3                         | pEYFP         | Fw: cgcgactcgagACC ATGTCAGAAGATTCAGAGGAGGAAGAC<br>Rev: cgccgcatcc CTGATGCTGTTGCAAGTTGGCTATC     |
| mCCP3_opt                     | pEYFP         | Synthetic gene optimized for bacterial codon usage (GeneCust).                                  |
| hCCP3                         | pOPINFS       | from N. Berrow (IRB, Barcelona, Spain)                                                          |
| mCCP4                         | pEGFP         | Fw: cgaattctagccATGGCTGAACAAGAAGGCAGT<br>Rev: ctggatccgggagacacagatgtcac (non coding region)    |
| mCCP5                         | pEYFP         | Fw: cgcgactcgagACC ATGGAGCTGCGCTGTGGGGGATTGC<br>Rev: cgcgaggtacc TCCCTCTGCGAGTCGGCGGTGAGC       |
| mCCP6                         | pEYFP         | Fw: cgcgactcgagACC ATGGCGGAGCGGAGCCAGACAGCGCC<br>Rev: ccgcagaTCT AAAGGGGGTTGATGGGTCTTTG         |
| mCCP2_N2190                   | pEYFP         | Fw: cgcgactcgagACC ATGAATGTCCTGCTTGAGATGGCTTTTC<br>Rev: cgcgatcc GCTCTTCTGGTACTGCTCATTCCG       |
| mCCP2_N1992                   | pEYFP         | Fw: cgcgactcgagACC ATGAATGTCCTGCTTGAGATGGCTTTTC<br>Rev: cgcgatcc TAAATCCATATCTTGTCCAAAGTTATTC   |
| mCCP2_Z1703                   | pEYFP         | Fw: cgactcgagACC atgGACTCACTTCTGCTGAGCTCGCC<br>Rev: cgcgatcc TAAATCCATATCTTGTCCAAAGTTATTC       |
| mCCP2_Z1334                   | pEYFP         | Fw: cgactcgagACC atgACACTGCAAGGGCCGGACGAC<br>Rev: cgcgatcc TAAATCCATATCTTGTCCAAAGTTATTC         |
| mCCP2_Z1607                   | pEYFP         | Fw: cgactcgagACC atgGACTCACTTCTGCTGAGCTCGCC<br>Rev: cgcgatcc GTCAGGATCACAGAAATCCAG              |
| mCCP3_N1998                   | pEYFP         | Fw: cgactcgagACC ATGAGCGAGGACTCTGAAGAAG<br>Rev: cgcgatcc GTAAACTTCTGCATATTGTTCTGG               |
| mCCP3_N1809                   | pEYFP         | Fw: cgactcgagACC ATGAGCGAGGACTCTGAAGAAG<br>Rev: cgcgatcc GGTATCCGTGTTATCGGAGACGC                |
| mCCP3_Z1670                   | pEYFP         | Fw: cgactcgagACC atgGACCCGTTTTTCCCACGCACCAC<br>Rev: cgcgatcc GGTATCCGTGTTATCGGAGACGC            |
| mCCP3_Z1325                   | pEYFP         | Fw: cgactcgagACC atgGTGGATAACTGCGACAACACCC<br>Rev: cgcgatcc GGTATCCGTGTTATCGGAGACGC             |
| mCCP3_Z1583                   | pEYFP         | Fw: cgactcgagACC atgGACCCGTTTTTCCCACGCACCAC<br>Rev: cgcgatcc GTCCGGGTCGCAGTAGTCCAG              |
| mCCP2_E593Q<br>(dead version) | pEYFP         | Fw: GCTACACCATGcAGTCTACCTTTGGC<br>Rev: CAAAGGTAGACTgCATGGTGTAGCTG                               |
| mCCP3_E540Q<br>(dead version) | pEYFP         | Fw: CTTTACCCTGcAAGCAACTTTCTGCG<br>Rev: GAAAGTTGCTTgCAGGGTGAAAGAATTGC                            |

**Table S2.** Primary antibodies used in this study

| Antibody name             | Antigen           | Type              | Dilutions   |                 |                       | Provider                                               |
|---------------------------|-------------------|-------------------|-------------|-----------------|-----------------------|--------------------------------------------------------|
|                           |                   |                   | immuno blot |                 | immuno cyto-chemistry |                                                        |
|                           |                   |                   | cell lines  | tissue extracts |                       |                                                        |
| 12G10                     | $\alpha$ -tubulin | mouse monoclonal  | 1:1,000     | 1:400           | -                     | from J. Frankel, E. M. Nelson, University of Iowa, USA |
| anti- $\beta$ -tubulin    | $\beta$ -tubulin  | mouse monoclonal  | -           | -               | 1:200                 | Sigma #T5201                                           |
| anti- $\Delta 2$ -tubulin | CEGEEEGE-COOH     | rabbit polyclonal | 1:5,000     | 1:5,000         | 1:1,000               | our own production                                     |
| anti-deTyr-tubulin        | -CGEEEGEE-COOH    | rabbit polyclonal | 1:2,000     | -               | -                     | Millipore #AB3201                                      |
| polyE                     | -CEEEEEEEEE-COOH  | rabbit polyclonal | 1:4,000     | 1:10,000        | -                     | our own production                                     |
| polyG                     | -CGGGGGGGGG-COOH  | rabbit polyclonal | 1:6,000     | -               | -                     | our own production                                     |
| anti-GFP                  | GFP, YFP, CFP     | rabbit polyclonal | 1:5,000     | -               | -                     | Torrey Pines Biolabs, #TP401                           |

**Table S3.** Search for C-terminal acidic amino acid stretches

| Organism                       | Number of proteins with uninterrupted E/D-stretches at the C-terminus |    |    |    |    |
|--------------------------------|-----------------------------------------------------------------------|----|----|----|----|
|                                | 2                                                                     | 3  | 4  | 5  | 6+ |
| <i>Homo sapiens</i>            | 287                                                                   | 60 | 16 | 12 | 24 |
| <i>Mus musculus</i>            | 218                                                                   | 55 | 9  | 4  | 23 |
| <i>Drosophila melanogaster</i> | 47                                                                    | 9  | 2  | 3  | 6  |
| <i>Caenorhabditis elegans</i>  | 42                                                                    | 14 | 6  | 3  | 4  |

| Organism                       | Number of proteins uninterrupted E-stretches at the C-terminus |    |   |   |    |
|--------------------------------|----------------------------------------------------------------|----|---|---|----|
|                                | 2                                                              | 3  | 4 | 5 | 6+ |
| <i>Homo sapiens</i>            | 94                                                             | 12 | 1 | 1 | 3  |
| <i>Mus musculus</i>            | 76                                                             | 7  | 1 | 1 | 4  |
| <i>Drosophila melanogaster</i> | 14                                                             | 1  | 0 | 0 | 2  |
| <i>Caenorhabditis elegans</i>  | 16                                                             | 0  | 0 | 0 | 2  |

**Table S4.** Primers used for qRT-PCR

| Specificity | Gene | Primer name | Sequence (5'-3')           |
|-------------|------|-------------|----------------------------|
| mouse       | CCP1 | AGTPBP1-U1  | TTCCACAGAGTCAGATACTGCCAGAT |
|             |      | AGTPBP1-L1  | CAGAACTTCCATGCCTGTAGAACCT  |
|             | CCP2 | AGBL2-U2    | AATCTGCAGAAAGCCGTCAGAGT    |
|             |      | AGBL2-L2    | AGTGTGTTTGTCCGTGTAGAGGTCA  |
|             | CCP3 | AGBL3-U1    | CTGTTTACCCAAACTCCAAGGAAGAT |
|             |      | AGBL3-L1    | GGATGTTTCGGTTACCCCAACT     |
|             | CCP4 | AGBL1-U2    | GAGCTGTCCTGTAGCTTTGAGGAACT |
|             |      | AGBL1-L2    | AAGCAACACTTGAATGTGGTGGT    |
|             | CCP5 | AGBL5-U2    | GCACCCAAAAGGTCAGCCAT       |
|             |      | AGBL5-L2    | GCCGCCTTCTGTCTGAGCA        |
|             | CCP6 | AGBL4-U2    | CCAAGAGTCTTTACCGAGATGGGAT  |
|             |      | AGBL4-L2    | CTGTGGTCTGGGCAGCGATAGT     |

**Supplemental References**

Gough, J., Karplus, K., Hughey, R., and Chothia, C. (2001). Assignment of homology to genome sequences using a library of hidden Markov models that represent all proteins of known structure. *J. Mol. Biol.* 313, 903–919.

Lupas, A., Dyke, M. Van, and Stock, J. (1991). Predicting coiled coils from protein sequences. *Science* 252, 1162–1164.

Otero, A., Rodríguez de la Vega, M., Tanco, S., Lorenzo, J., Avilés, F. X., and Reverter, D. (2012). The novel structure of a cytosolic M14 metalloprotease (CCP) from *Pseudomonas aeruginosa*: a model for mammalian CCPs. *FASEB J.* 26, 3754–3764.

Parry, D. a D., Fraser, R. D. B., and Squire, J. M. (2008). Fifty years of coiled-coils and alpha-helical bundles: a close relationship between sequence and structure. *J. Struct. Biol.* 163, 258–269.

**A**

```

3l2nA 1 P Y S Y E R H L D L I S A V Q - - - L H P L V S T E H L G L T L D G R D M T L V K V G D D D P - - - 44
3k2kA 1 P Y S E E R H S E F L G A V Q - - - Q M P Q A S V V E L G R T V E G R P M S L V V L G T P D - - - 43
4a37A 1 P Y S R E R H A R L V E R A L - - - G I E G V E R L A V G T S V Q G R D I E L L R V R R H P D - - - 44
hCCP3 1 P Y T Y T N L Q E Y L S G I N N D P V R S K F C K I R V L C H T L A R N M V Y I L T I T P L K N S D 51

3l2nA 45 - - S K K S I W I T A R Q H P G E T M A E W L V E G L L N Q L L D - - - N D C P T S K A L L D K A N 89
3k2kA 44 - - A K K K V W I I A R Q H P G E S M A E W F I E G L V K R L V G W G D W S G D P V A R K L Y D H A T 92
4a37A 45 - - S H L K L W V I A Q Q H P G E H M A E W F M E G L I E R L Q R - - - P D D T E M Q R L L E K A D 89
hCCP3 52 S R K R K A V I L T A R V H P G E T N S S W I M K G F L D Y I L G - - - - N S S D A Q L L R D T F V 97

3l2nA 90 F Y I V P N M N P D G S V R G H L R T N A V G A N L N R E W Q T P S L E R S P E V Y Y V V N K M H E T 140
3k2kA 93 F Y I V P N M N P D G S V H G N L R T N A A G A N L N R E W M E P D A E R S P E V L V V R D A I H A I 143
4a37A 90 L Y L V P N M N P D G A F H G N L R T N A A G Q D L N R A W L E P S A E R S P E V W F V Q Q E M K R H 140
hCCP3 98 F K V V P M L N P D G V I V G N Y R C S L A G R D L N R N Y T S L L K E S F P S V W Y T R N M V H R L 148

3l2nA 141 - - - G V D L F Y D V H G D E G L P Y V F L A G C E G I P N Y S D K L A S L Q Q D F V A A L S L A S 187
3k2kA 144 - - - G C D L F F D I H G D E D L P Y V F A A G S E M L P G F T E Q Q R V E Q S A F I D S F K R A S 190
4a37A 141 - - - G V D L F L D I H G D E E I P H V F A A G C E G N P G Y T P R L E R L E Q R F R E E L M A R G 187
hCCP3 149 M E K R E V I L Y C D L H G H S R K E N I F M Y G C D G S D R S - K T L Y L Q Q R I F P L M L S K N C 198

3l2nA 188 A D - F - - - Q T E F G Y D K D E P G K A N L T V A C N W V A N T F K C L S N T L E M P F K D N A N L 234
3k2kA 191 P D - F - - - Q D E H G Y P P G K Y R E D A F K L A S K Y I G H R F G C L S L T L E M P F K D N A N L 237
4a37A 188 - E - F - - - Q I R H G Y P R S A P G Q A N L A L A C N F V G Q T Y D C L A F T I E M P F K D H D D N 233
hCCP3 199 P D K F S F S A C K F N V Q K S K E G - - - - T G R V V M W K M G I R N S F T M E A T F C G S T L G 244

3l2nA 235 A D P P F Q G W S P E R S V Y F G E A S L I A M R A V I D K I G Q 266
3k2kA 238 P D E H I G W N G A R S A S L G A A M L G A I L E H V R A F - - 267
4a37A 234 P E P G T G W S G A R S K R L G Q D V L S T L A V L V D E L R - 264
hCCP3 245 N K R G T H F S T K D L E S M G Y H F C D S L L D Y C D P D R T 276
    
```

**B**

| Position in bovine CPA<br>(active form) | Homologous amino acid residues forming S1' subsite |     |                  |     |     |     |     |                  |     | Substrate specificity | MEROPS classification |
|-----------------------------------------|----------------------------------------------------|-----|------------------|-----|-----|-----|-----|------------------|-----|-----------------------|-----------------------|
|                                         | 194                                                | 203 | 207 <sup>a</sup> | 243 | 247 | 250 | 253 | 255 <sup>b</sup> | 268 |                       |                       |
| Bovine CPA                              | Ser                                                | Leu | Gly              | Ile | Ile | Ala | Gly | Ile              | Thr | Hydrophobic           | M14A                  |
| Human CPA1                              | Ser                                                | Met | Gly              | Ile | Ile | Ala | Ser | Ile              | Thr | Hydrophobic           |                       |
| Human CPA2                              | Thr                                                | Met | Gly              | Ile | Ile | Ala | Gly | Ile              | Ala | Hydrophobic           |                       |
| Human CPA4                              | Asp                                                | Met | Gly              | Thr | Val | Ala | Ser | Ile              | Thr | Hydrophobic           |                       |
| CPT <sup>c</sup>                        | Thr                                                | Leu | Gly              | Gln | Leu | Thr | Asp | Thr              | Thr | Broad                 |                       |
| Human CPB                               | Thr                                                | Ile | Ser              | Gly | Ile | Ala | Gly | Asp              | Thr | Basic                 |                       |
| TAFI (CPU)                              | Ser                                                | Val | Ser              | Gly | Leu | Ala | Gly | Asp              | Thr | Basic                 |                       |
| Human CPE                               | Asn                                                | Asn | Asp              | Gly | Trp | Val | Gly | Gln              | Thr | Basic (Arg)           | M14B                  |
| Human CPD                               | Asn                                                | Asn | Asp              | Asn | Phe | Val | Gly | Gln              | Thr | Basic (Lys)           | M14A                  |
| Human CPO                               | Thr                                                | Leu | Gly              | Asn | Leu | Ser | Ser | Arg              | Thr | Acidic                | M14A                  |
| Human/ mouse CCP1                       | Asp                                                | Val | Gly              | Met | Ser | Lys | Thr | Arg              | Thr | Acidic                | M14D <sup>d</sup>     |
| Human/ mouse CCP2                       | Asp                                                | Val | Gly              | Met | Ser | Arg | Thr | Arg              | Thr | Acidic                |                       |
| Human/ mouse CCP3                       | Asp                                                | Ile | Gly              | Phe | Asn | Lys | Thr | Arg              | Thr | Acidic                |                       |
| Human/ mouse CCP4                       | Asp                                                | Ile | Gly              | Phe | Lys | Lys | Thr | Arg              | Thr | Acidic                |                       |
| Human/ mouse CCP5                       | Asp                                                | Cys | Gly              | Phe | Asn | Lys | Ser | Arg              | Thr | Acidic                |                       |
| Human/ mouse CCP6                       | Asp                                                | Gly | Gly              | Tyr | Ser | Lys | Thr | Arg              | Thr | Acidic                |                       |

**C**

```

                243 247                250 253 255                268 270
CPA1_BOVIN  T-SYKYG-SIITTIYQ-----ASGGSIDWSYNQ--GIKYSFTFELRDTGR
CCP1        I-APA-F-CMSSCSFVVEK-----SKESTAR VVVWREIGVQRSYTMESTLCGC
CCP4        L-APA-F-TMSSCSFLVEK-----SRASTAR-VVVWREMGVRSYTMESYCGC
CCP2        N-APDKF-SFHSCNFVKQK-----CKEGTGR-VVMWR-MGILNSYTMESTFGGS
CCP3        N-CPDKF-SFSACKFNQK-----SKEGTGR-VVMWK-MGIRNSFTMEATFCGS
CCP5        N-SAH-F-DFQGCNFSKKNMYARDRRDQSKEGSGR-VAIYKASGIHSYTLKCNNTG
CCP6        N-AED-F-SYSSTSFNRDA-----VKAGTGRFLGGLDHTSYCYTLKESVFSY
    
```





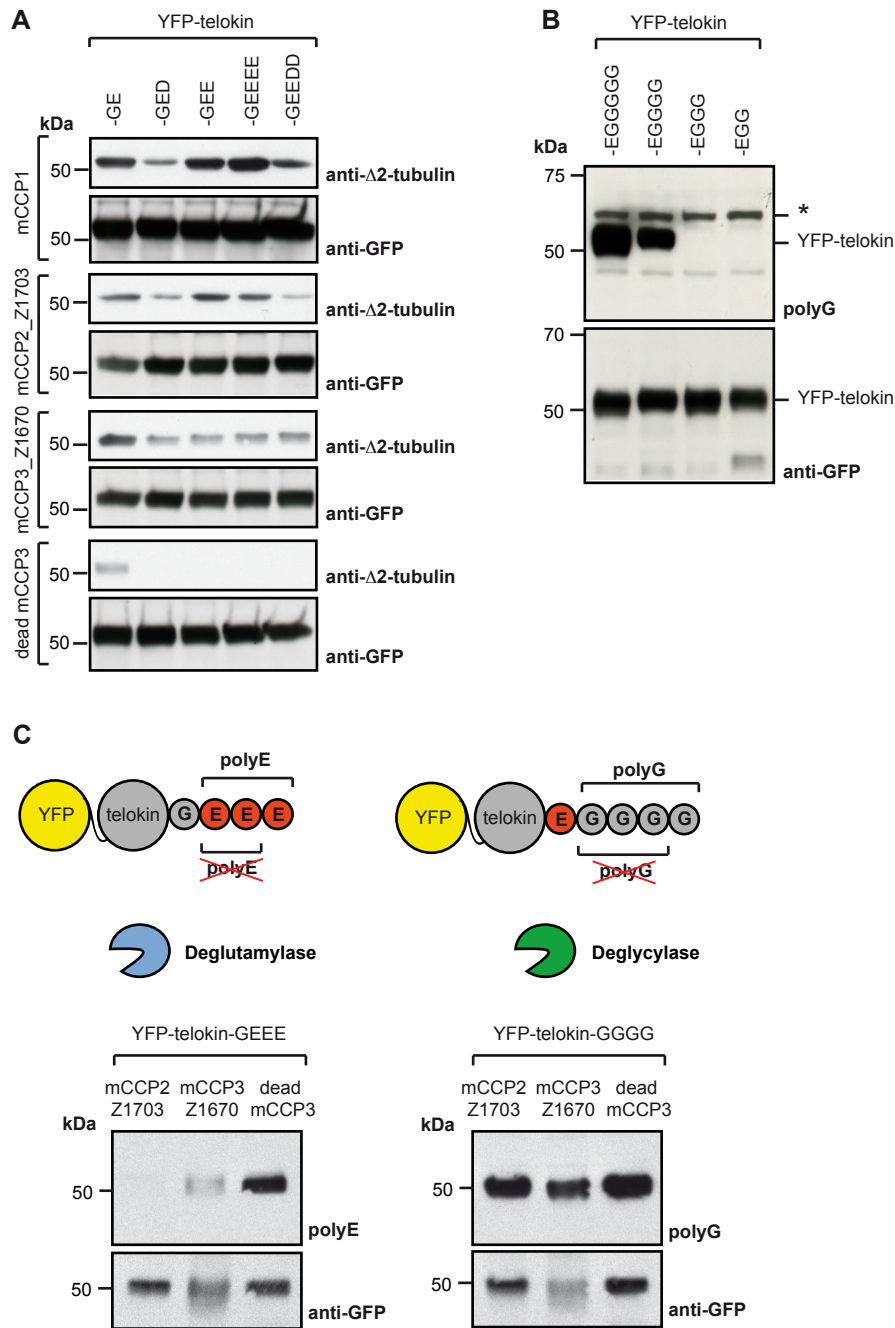

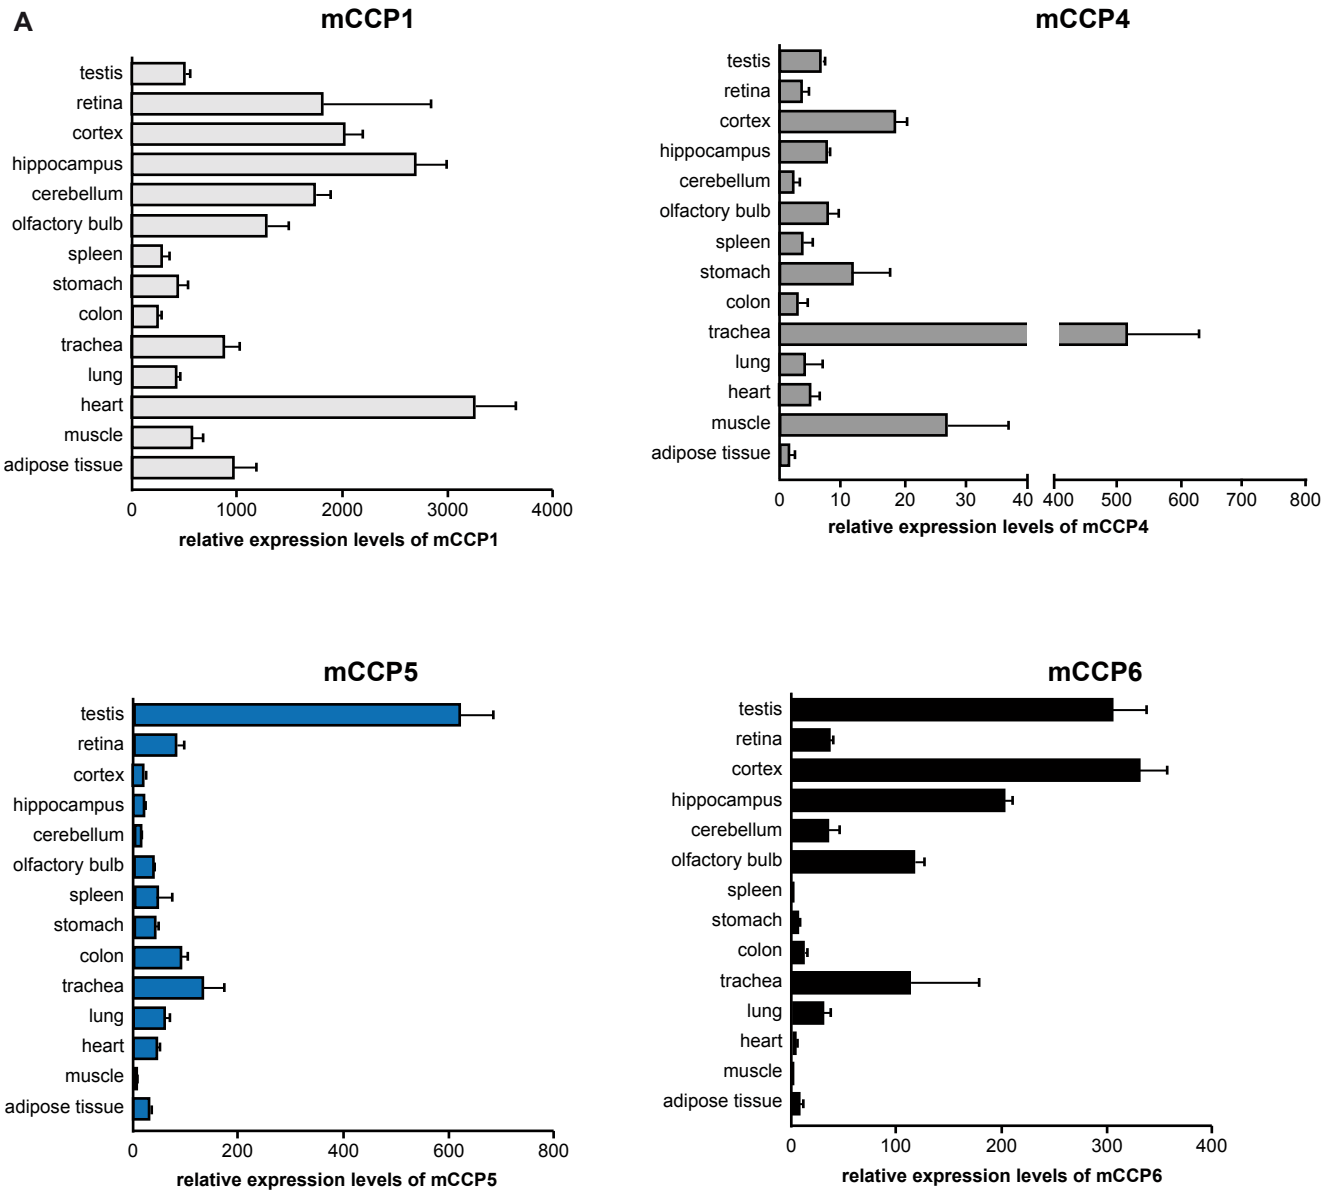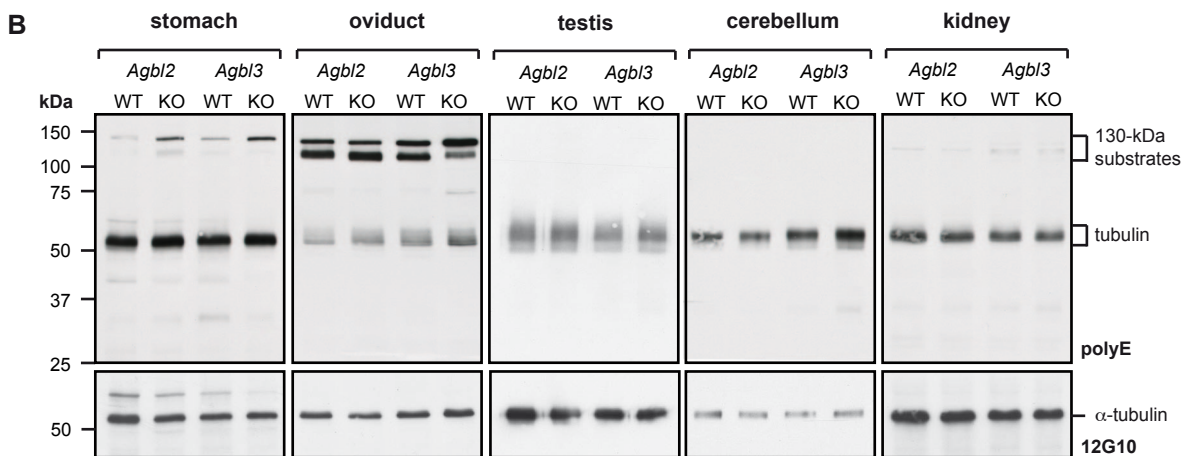

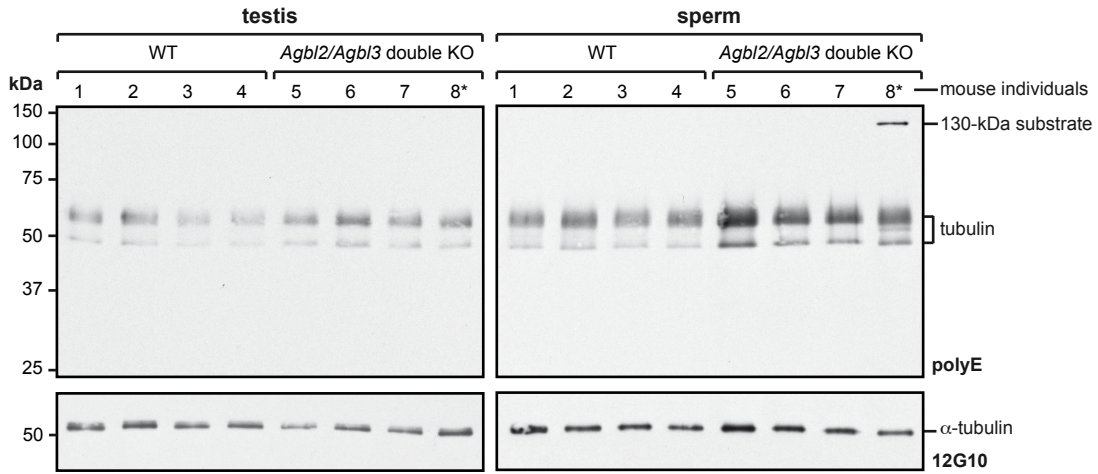

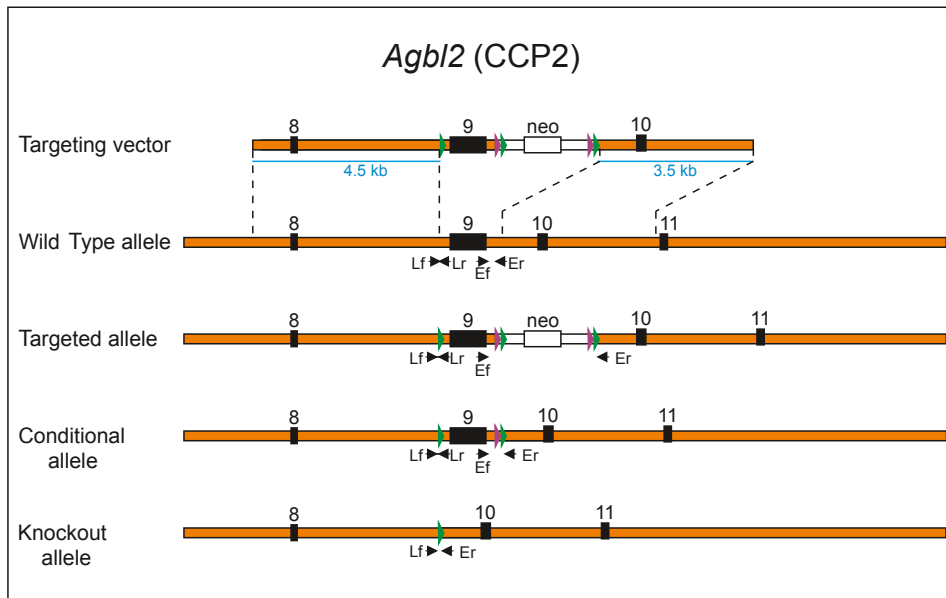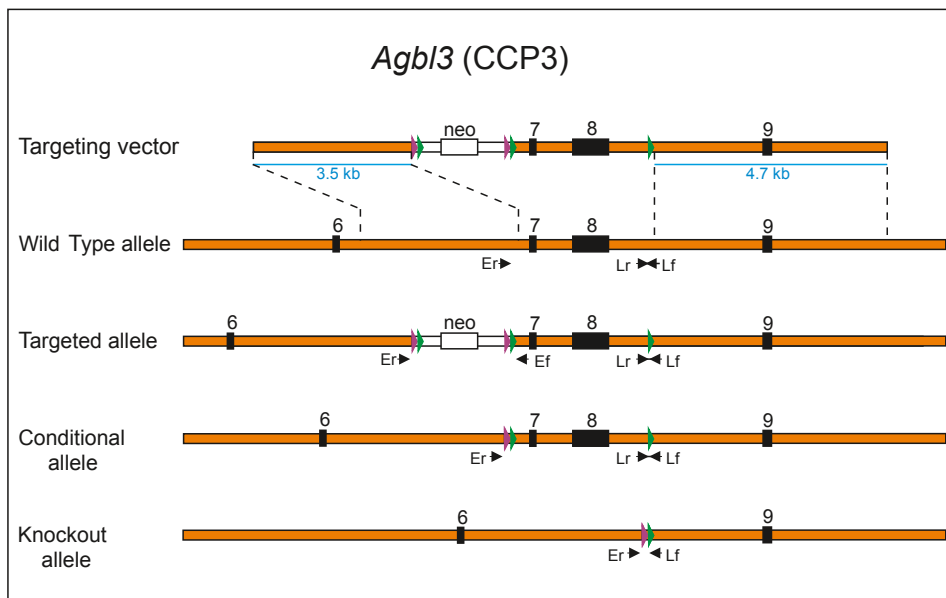

Supplement: supp_E14-06-1072_Tort_suppl_Figure.pdf [file supp_E14-06-1072_Tort_suppl_Figure.pdf]
